# Supplementary material
Source: publisher figshare collection journal article supplement (https://frontiersin.figshare.com/ndownloader/files/27982926)
Supplement: Supplementary file 1 [file 27982926]

*Supplementary Material*

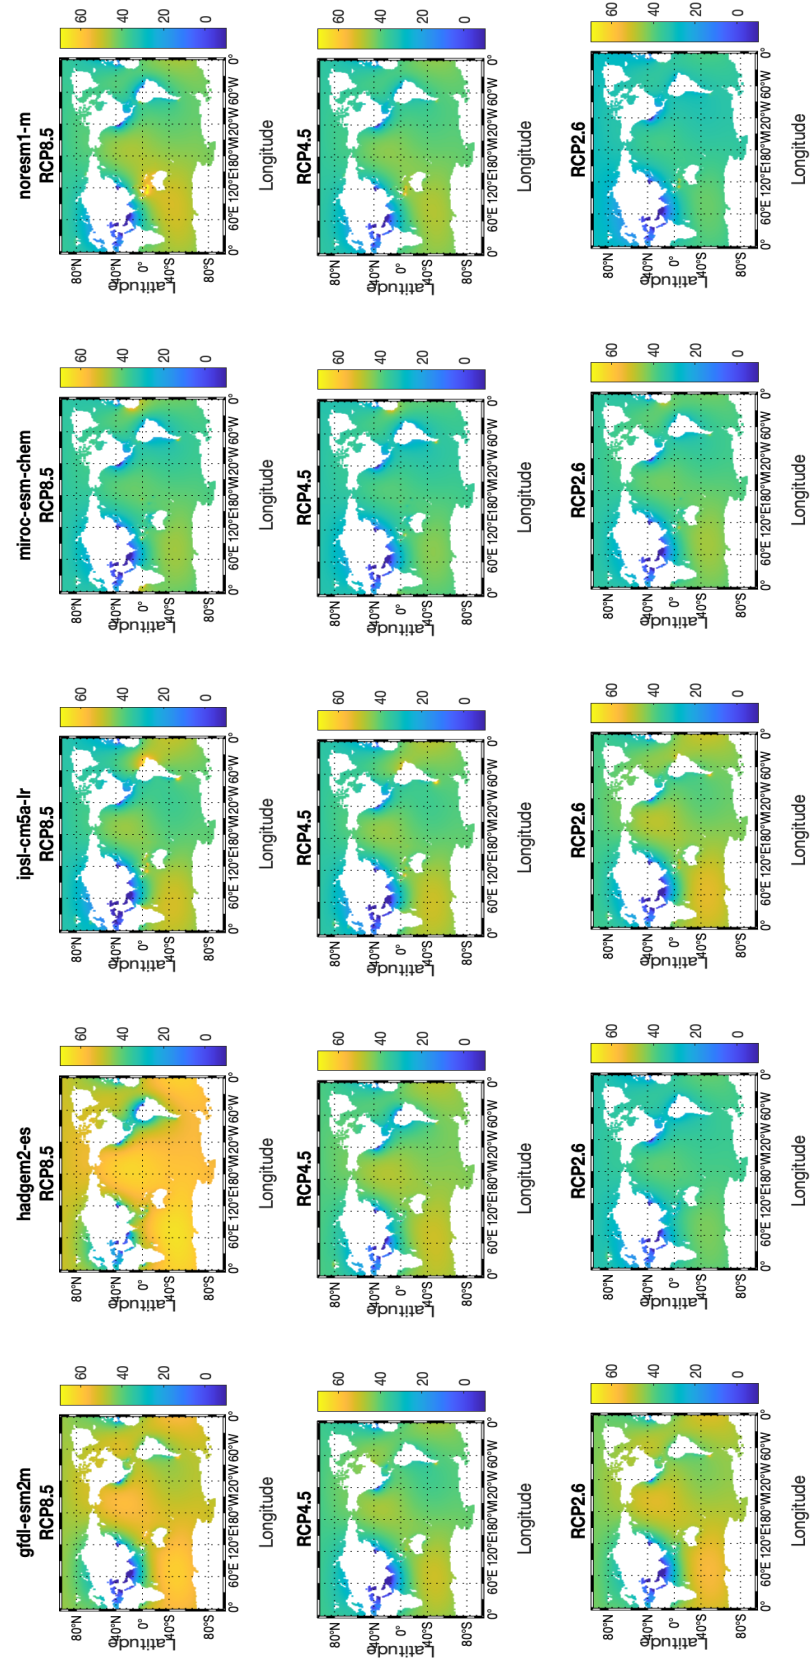

**Supplementary Figure A.** LWS-driven regional sea level changes (mm) for five individual climate models based on three RCPs by the end of 21st century.

| <i>Scenario\Model</i> | <i>HADGEM</i> | <i>GFDL</i> | <i>IPSL</i> | <i>MIROC</i> | <i>NORES</i> | <i>LWSensmean</i> | <i>GWensmean</i> |
|-----------------------|---------------|-------------|-------------|--------------|--------------|-------------------|------------------|
| <i>RCP8.5</i>         | 53.1          | 48.2        | 39.0        | 36.1         | 40.7         | 43.3(%7)          | 41.4             |
| <i>RCP4.5</i>         | 41.0          | 39.5        | 38.9        | 34.6         | 38.3         | 38.5(%9)          | 40.5             |
| <i>RCP2.6</i>         | 34.9          | 44.5        | 41.5        | 36.7         | 32.8         | 38.1(%11)         | 39.6             |

**Supplementary Table A.** LWS-driven GMSL based on climate models and RCP scenarios from the difference of periods between 1986-2005 and 2081-2099.
